# Supplementary material
Source: PubMed Central journal article supplement (PMC4639986)
Supplement: JCI81550sd.pdf [file JCI81550sd.pdf]

## SUPPLEMENTAL FIGURE LEGENDS

**Figure S1 Genetic or pharmacologic COX-2 inhibition led to increased kidney macrophage infiltration.** Wild type or COX-2<sup>-/-</sup> mice (2 months old, C57/Bl6 background) were treated with a high salt diet (HS) for 4 weeks. **(A)** Kidney macrophage infiltration was markedly higher in HS plus SC58236-treated mice than in HS-treated mice, as indicated by immunostaining of F4/80, a marker of macrophages/dendritic cells (\*\*\*  $P < 0.001$ ,  $n = 4$  in each group). **(B)** HS-treated COX-2<sup>-/-</sup> mice had more kidney macrophages compared to HS-treated wild type mice. Original magnification: x 160 in both **A** and **B**. All values are means  $\pm$  SEM. All  $P$  values were calculated by Student's  $t$  test.

**Figure S2 COX-2 inhibition led to increased M1 but decreased M2 markers *in vivo* and *in vitro*.** **(A)** Kidney mRNA levels of M1/Th1 markers/cytokines including iNOS, CCL3, TNF- $\alpha$ , IL-1 $\alpha$  and IL-1 $\beta$  were markedly higher but that of mannose receptor (MR) were markedly lower in HS plus SC58236-treated mice than in mice with HS alone (\*\* $P < 0.01$  and \*\*\* $P < 0.001$ ,  $n = 4$  in each group). **(B)** Freshly isolated peritoneal macrophages treated with 25  $\mu$ M SC58236 for 24 h had decreased protein levels of MR and arginase 1 (M2 markers) but increased protein levels of TNF-  $\alpha$  (M1 marker). All values are means  $\pm$  SEM. All  $P$  values were calculated by Student's  $t$  test.

**Figure S3 Mice with a deficient hematopoietic cell COX-2 pathway had increased heart hypertrophy in response to chronic high salt intake.** **(A)** Heart weight vs. body weight ratios were higher in HS-treated COX-2<sup>-/-</sup>-WT BMT mice than in HS-treated WT-WT BMT mice (\*\* $P < 0.01$ ,  $n = 4$ ). **(B)** Heart weight vs. body weight ratios were also higher in HS-

treated CD11b-Cre; EP<sub>4</sub><sup>ff</sup> mice than in HS-treated EP<sub>4</sub><sup>ff</sup> mice (\*\*\* $P$ <0.001,  $n$  = 4). All values are means  $\pm$  SEM. All  $P$  values were calculated by Student's  $t$  test.

**Figure S4 Prostaglandin EP<sub>4</sub> receptor tonically suppressed Th1 cytokine expression in cultured macrophages.** (A) Murine macrophage RAW264.7 cells expressed COX-2, mPGES1 and VEGF-C. EP<sub>4</sub> was the major EP receptors in RAW264.7 cells. COX-1 and EP<sub>1</sub> receptor were undetectable. (B) Treatment of RAW264.7 cells with a selective EP<sub>4</sub> receptor antagonist, L-161,982 (20  $\mu$ M), led to increased mRNA levels of M1/Th1 markers/cytokines, including iNOS, IL-23 $\alpha$ , CCL3, TNF- $\alpha$ , IL-1 $\alpha$  and IL-6 (\*\*\* $P$ <0.001,  $n$  = 3). (C) PGE<sub>2</sub> led to inhibition of iNOS expression, which was prevented by the selective EP<sub>4</sub> receptor antagonist, L-161,982 (\*\*\* $P$ <0.001 vs. PGE<sub>2</sub> alone,  $n$  = 4 in each group). All values are means  $\pm$  SEM. All  $P$  values were calculated by Student's  $t$  test.

**Figure S5 Macrophage EP<sub>4</sub> receptor was effectively deleted in CD11b-Cre; EP<sub>4</sub><sup>ff</sup> mice.** Peritoneal macrophages were isolated and EP<sub>4</sub> mRNA was quantitated by qPCR. Macrophage EP<sub>4</sub> mRNA levels were significantly lower in CD11b-Cre; EP<sub>4</sub><sup>ff</sup> mice than in EP<sub>4</sub><sup>ff</sup> mice (\*\* $P$ <0.01,  $n$  = 4). All values are means  $\pm$  SEM. All  $P$  values were calculated by Student's  $t$  test.

**Figure S6 The expression levels of p-NCC were increased in HS-treated mPGES-1<sup>-/-</sup>-WT BMT mouse than in HS-treated WT-WT BMT control.**

**Figure S7 Increased medium NaCl elevated mRNA levels of COX-2 and NFAT5 and VEGF-C in cultured macrophage cells.** (A) Addition of 40 mM NaCl to the medium increased RAW264.7 cell COX-2 and NFAT5 mRNA levels at 2.5 h and also increased VEGF-C mRNA levels at 5 h (\* $P$ <0.05 and \*\* $P$ <0.01 vs. control,  $n$  = 4 in each group). (B)

PGE<sub>2</sub> (100 nM) stimulated RAW264.7 cell NFAT5 mRNA expression (\*\* $P < 0.01$ ,  $n = 4$ ). All values are means  $\pm$  SEM. All  $P$  values were calculated by Student's  $t$  test.

**Figure S8** COX-2<sup>-/-</sup>-COX-2<sup>-/-</sup> BMT mice had increased skin Na and K content and increased water content in response to high salt intake. (A) HS-treated COX-2<sup>-/-</sup>-COX-2<sup>-/-</sup> BMT mice had higher skin sodium and potassium content, compared to HS-treated WT-WT BMT mice (\* $P < 0.05$ ,  $n = 4$ ). (B) HS-treated COX-2<sup>-/-</sup>-COX-2<sup>-/-</sup> BMT mice had higher skin water content, compared to HS-treated WT-WT BMT mice (\* $P < 0.05$ ,  $n = 4$ ). All values are means  $\pm$  SEM. All  $P$  values were calculated by Student's  $t$  test.

**Figure S9** Renal ENaC mRNA levels were higher in HS-treated COX-2<sup>-/-</sup>-WT BMT and mPGES-1<sup>-/-</sup>-WT BMT mice than in HS-treated WT-WT BMT mice. Both ENaC $\beta$  and ENaC $\gamma$  mRNA levels were significantly higher in COX-2<sup>-/-</sup>-WT BMT and mPGES-1<sup>-/-</sup>-WT BMT mice than in WT-WT BMT mice in response to a high salt diet. (\* $P < 0.05$ ,  $n = 5$  in each group). All values are means  $\pm$  SEM. All  $P$  values were calculated by Student's  $t$  test.

**Figure S10.** Deficiency in hematopoietic cell COX-2 pathway had no effects on water and salt balance. Trained mice were given 1 mEq of NaCl via gastric gavage, and urine was collected every 12 h for next 72 h. (A and B) Both urine volume and sodium excretion were comparable between WT-WT and COX-2<sup>-/-</sup>-WT BMT mice ( $n = 4$ ) (A) or between EP<sub>4</sub><sup>ff</sup> mice and CD11b-Cre; EP<sub>4</sub><sup>ff</sup> mice ( $n = 6$ ) (B).

**Figure S11** Blood pressure was comparable between control COX-2<sup>-/-</sup>-WT BMT and WT-WT BMT Mice measured by tail-cuff microphonic manometer or carotid catheterization ( $n = 6$  in each group).

**Supplemental Table 1.** Renal and Hematologic Parameters After BMT

| Parameters                    | Na (mM) | K (mM)    | Cl (mM) | TCO <sub>2</sub> (mM) | BUN (mg/dl) | HCT (%) | Hgb (g/dl) |
|-------------------------------|---------|-----------|---------|-----------------------|-------------|---------|------------|
| <b>Control</b>                | 148 ± 1 | 5.5 ± 0.7 | 115 ± 2 | 21 ± 1                | 21 ± 4      | 52 ± 2  | 17 ± 1     |
| <b>WT-WT</b>                  | 148 ± 1 | 5.6 ± 0.6 | 117 ± 2 | 22 ± 2                | 20 ± 1      | 50 ± 1  | 17 ± 1     |
| <b>COX-2<sup>-/-</sup>-WT</b> | 148 ± 2 | 5.6 ± 1.2 | 116 ± 2 | 25 ± 3                | 17 ± 3      | 48 ± 3  | 16 ± 1     |

Six weeks after BMT, renal and hematologic parameters were measured. Data were presented as mean ± s.e.m (n = 3 in each group).

**A**

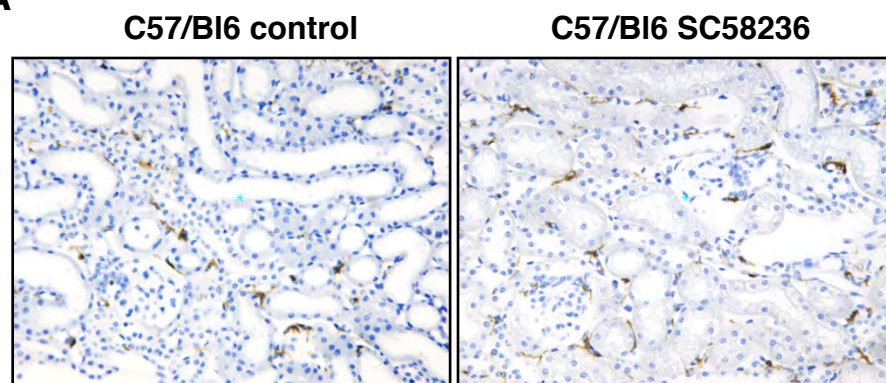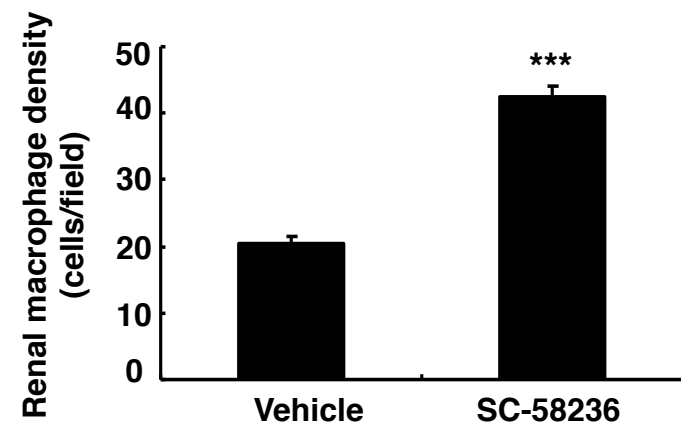

**B**

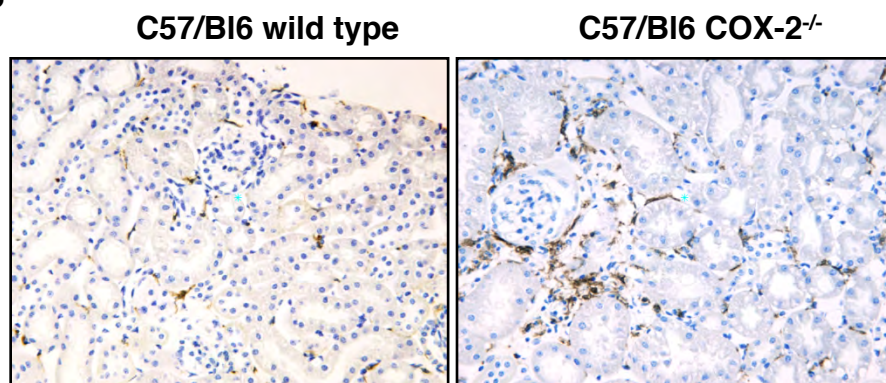

**Supplemental Figure 1**

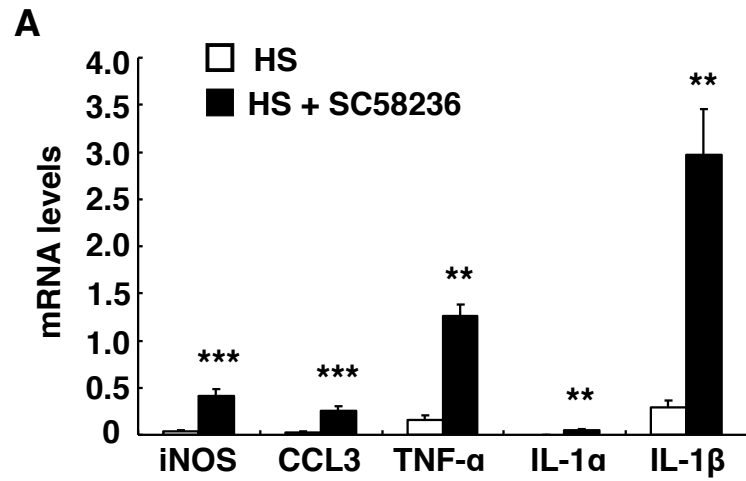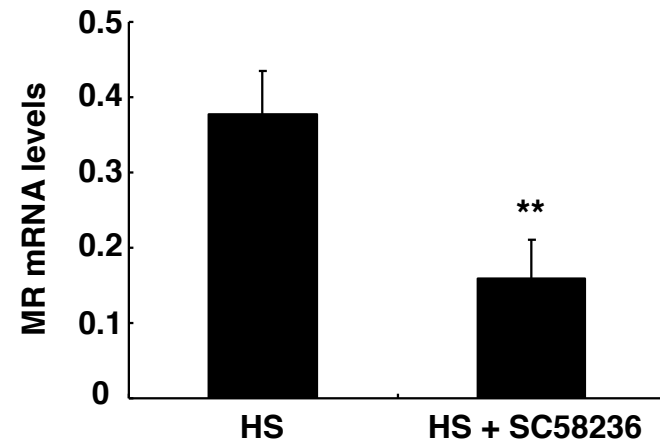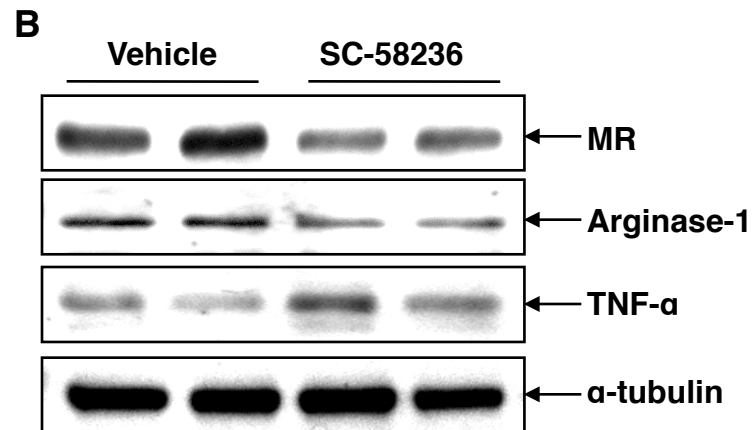

Supplemental Figure 2

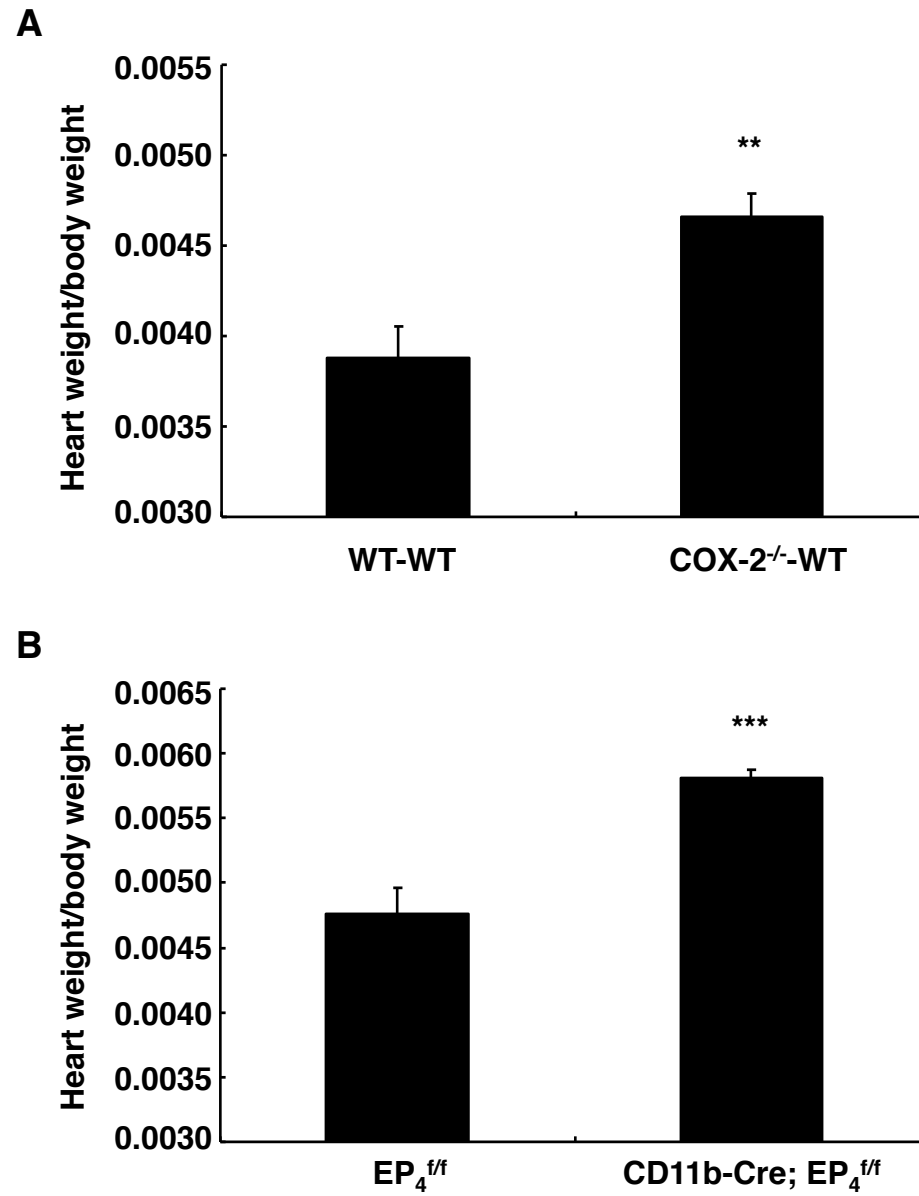

Supplemental Figure 3

**A****Mouse macrophage cell line RAW264.7**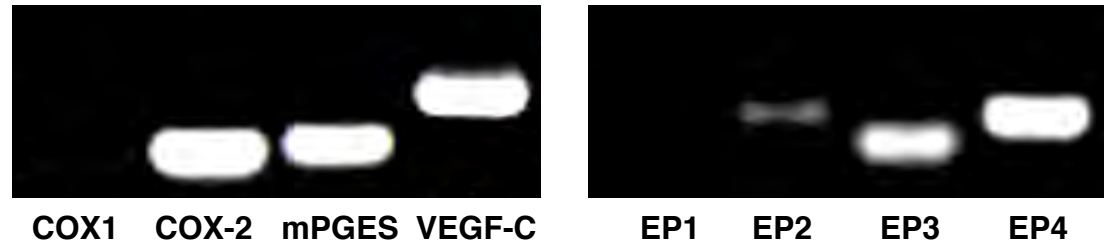**B**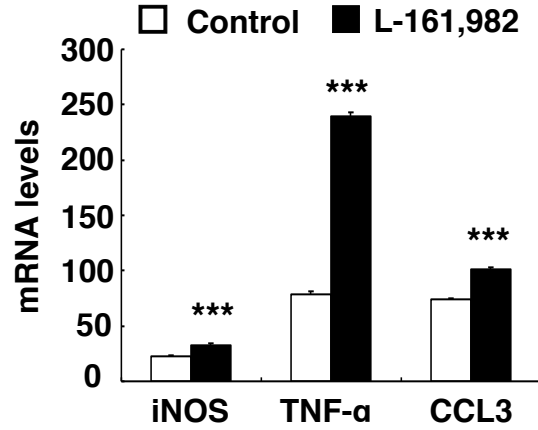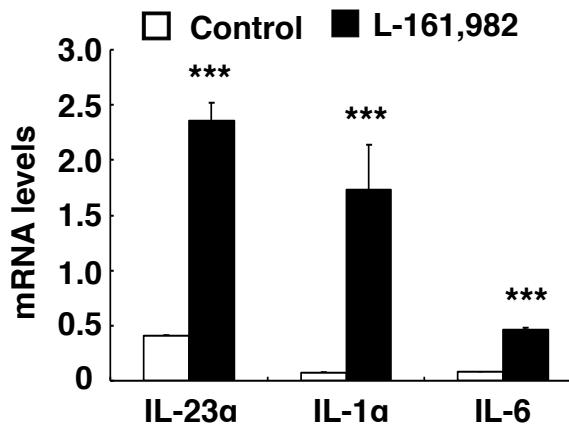**C**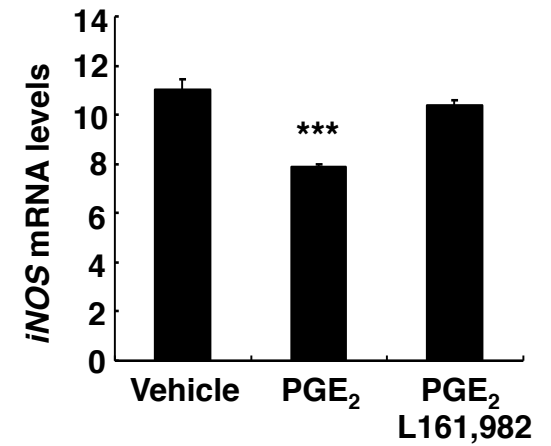

**Supplemental Figure 4**

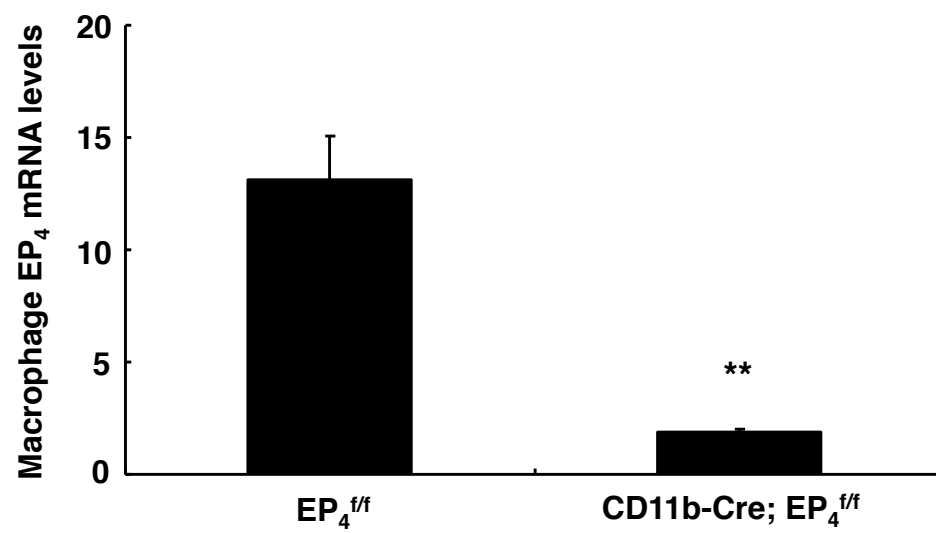

**Supplemental Figure 5**

**WT-WT**

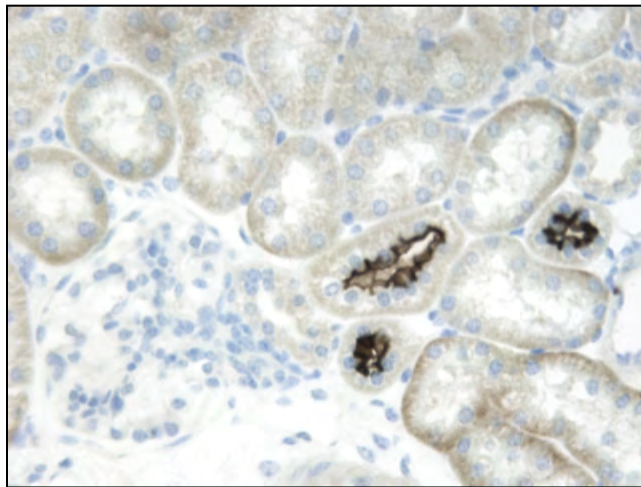

**mPGES-1<sup>-/-</sup>-WT**

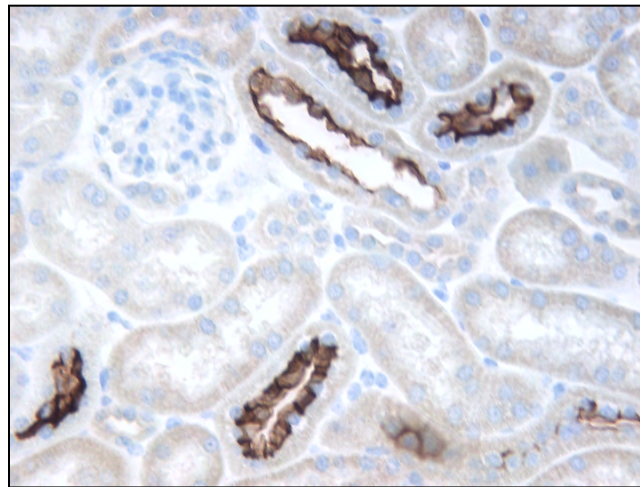

p-NCC immunostaining: original magnification: x 250.

**Supplemental Figure 6**

**A**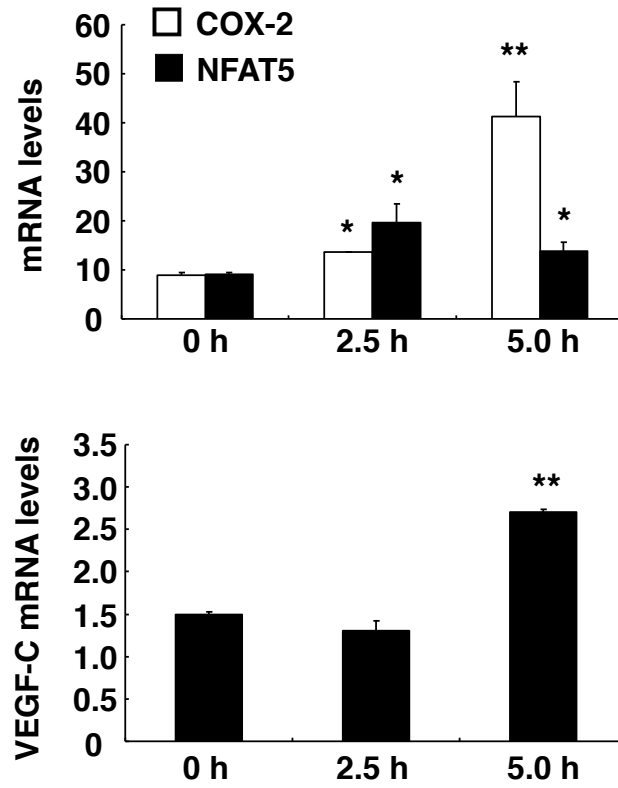**B**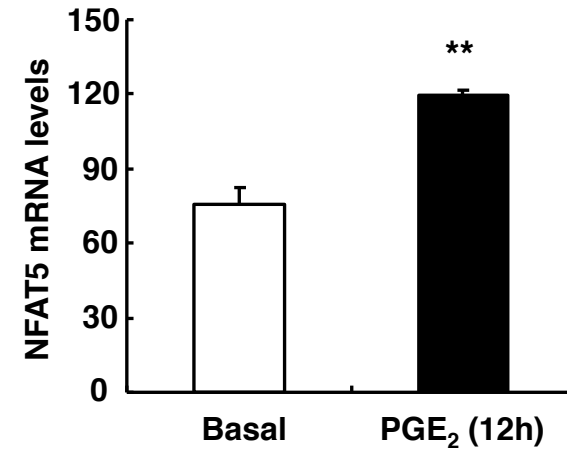

**Supplemental Figure 7**

**A**

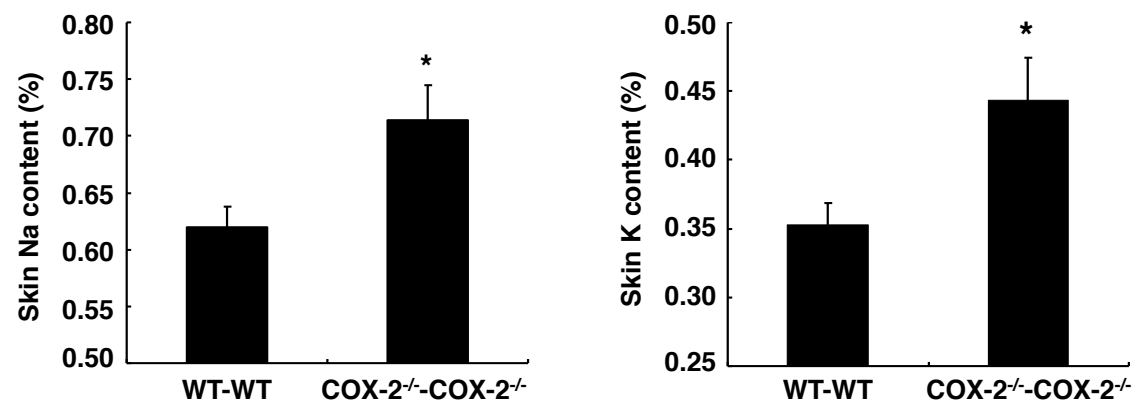

**B**

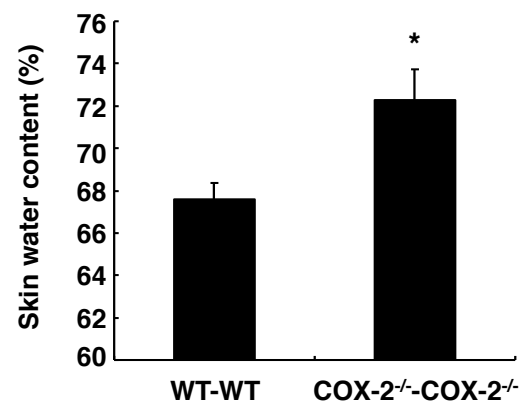

**Supplemental Figure 8**

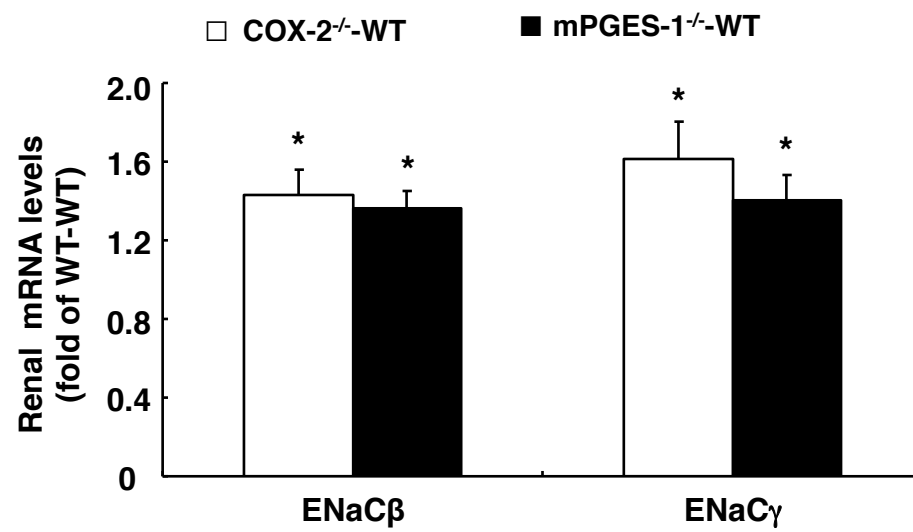

**Supplemental Figure 9**

**A**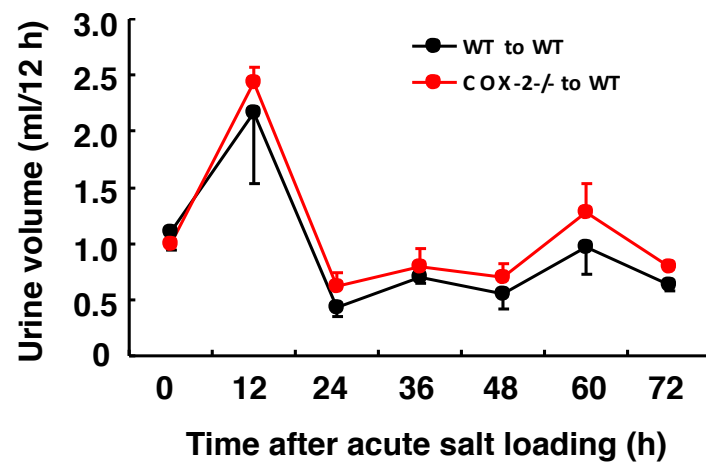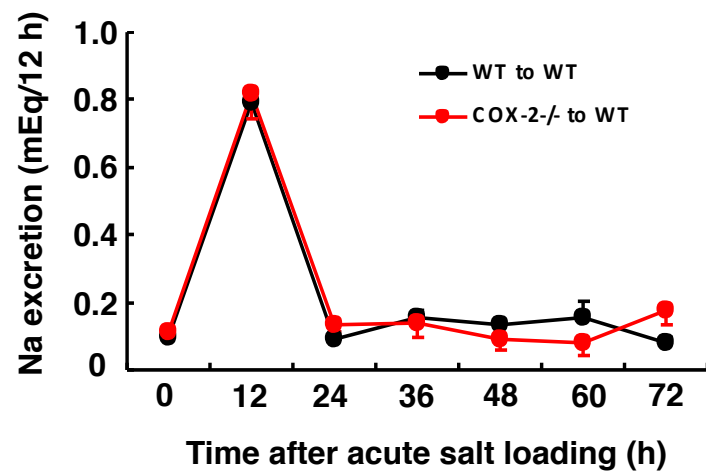**B**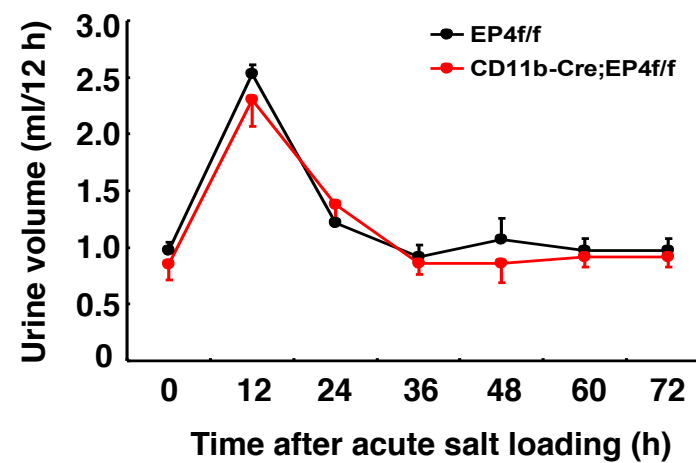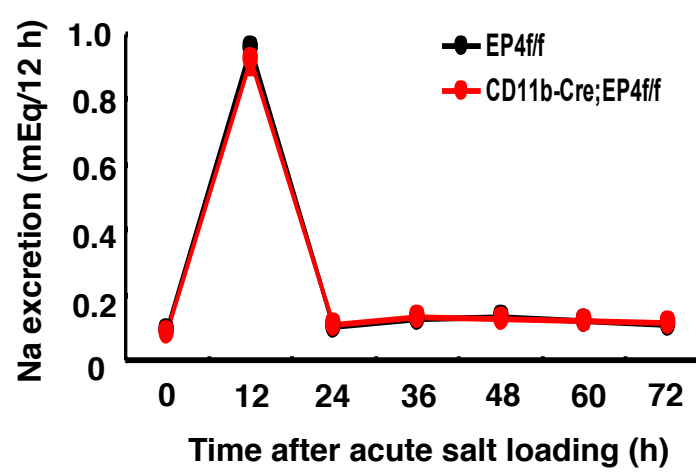

Supplemental Figure 10

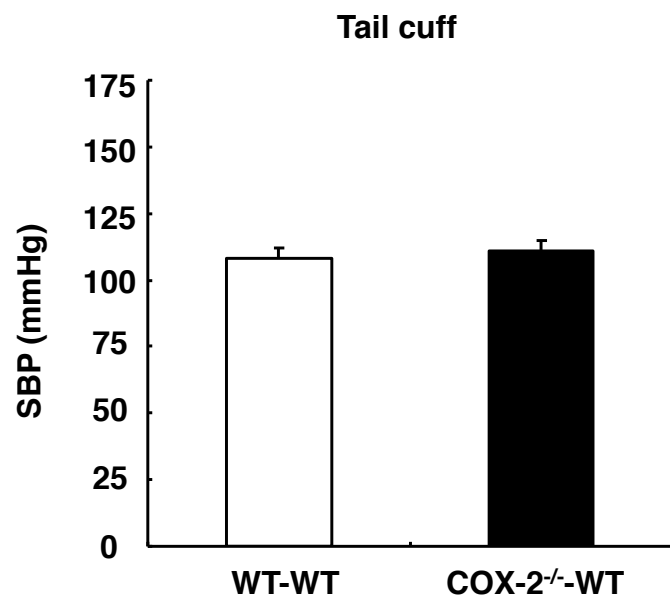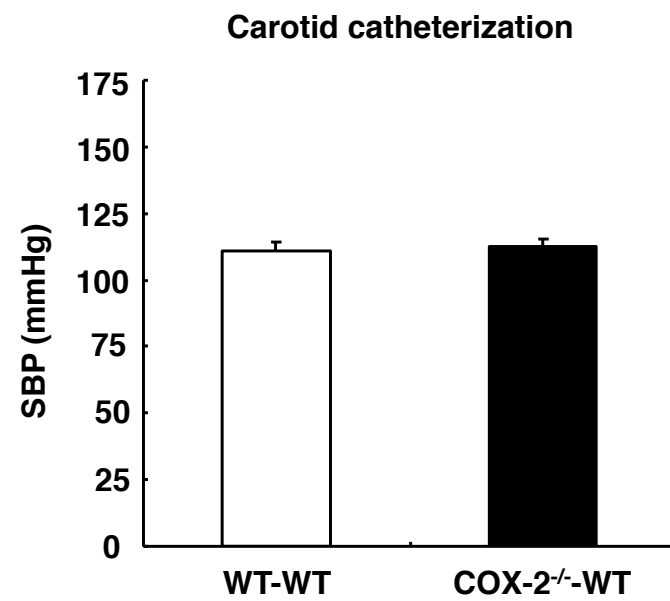

**Supplemental Figure 11**
